# Supplementary material for: A high-resolution gene expression atlas of epistasis between gene-specific transcription factors exposes potential mechanisms for genetic interactions
Source: PubMed Central journal article supplement (PMC4690272; doi:10.1186/s12915-015-0222-5), 2015-12-23

**A**

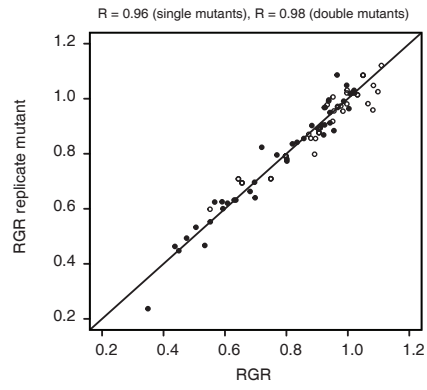

**B**

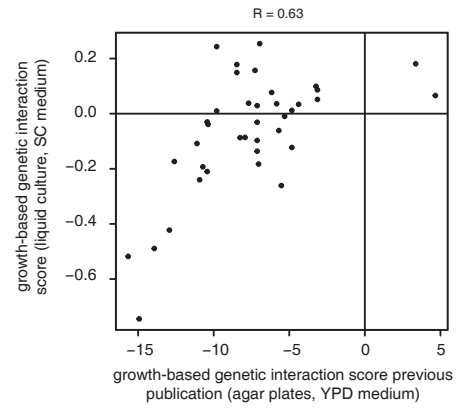

Supplement: 12915_2015_222_MOESM2_ESM.pdf [file 12915_2015_222_MOESM2_ESM.pdf]
