# Supplementary material for: A high-resolution gene expression atlas of epistasis between gene-specific transcription factors exposes potential mechanisms for genetic interactions
Source: PubMed Central journal article supplement (PMC4690272; doi:10.1186/s12915-015-0222-5), 2015-12-23

A

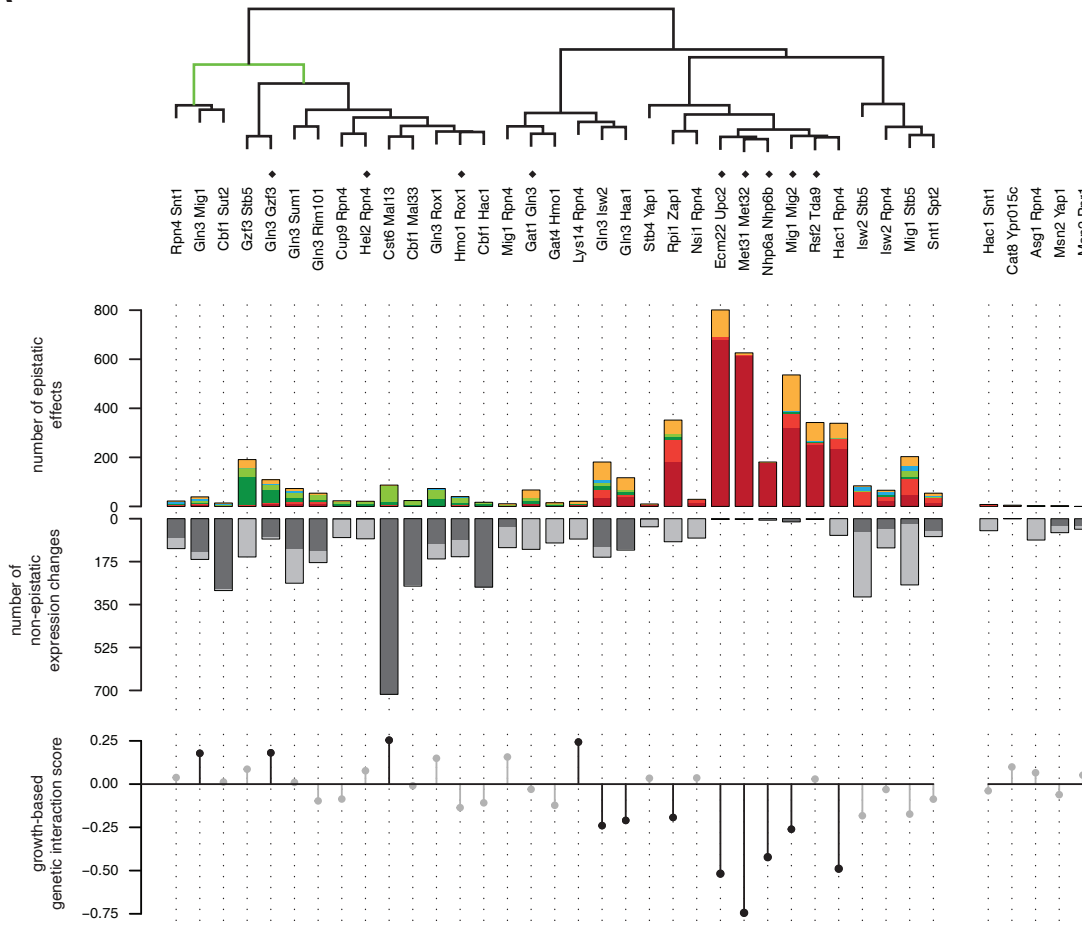

B

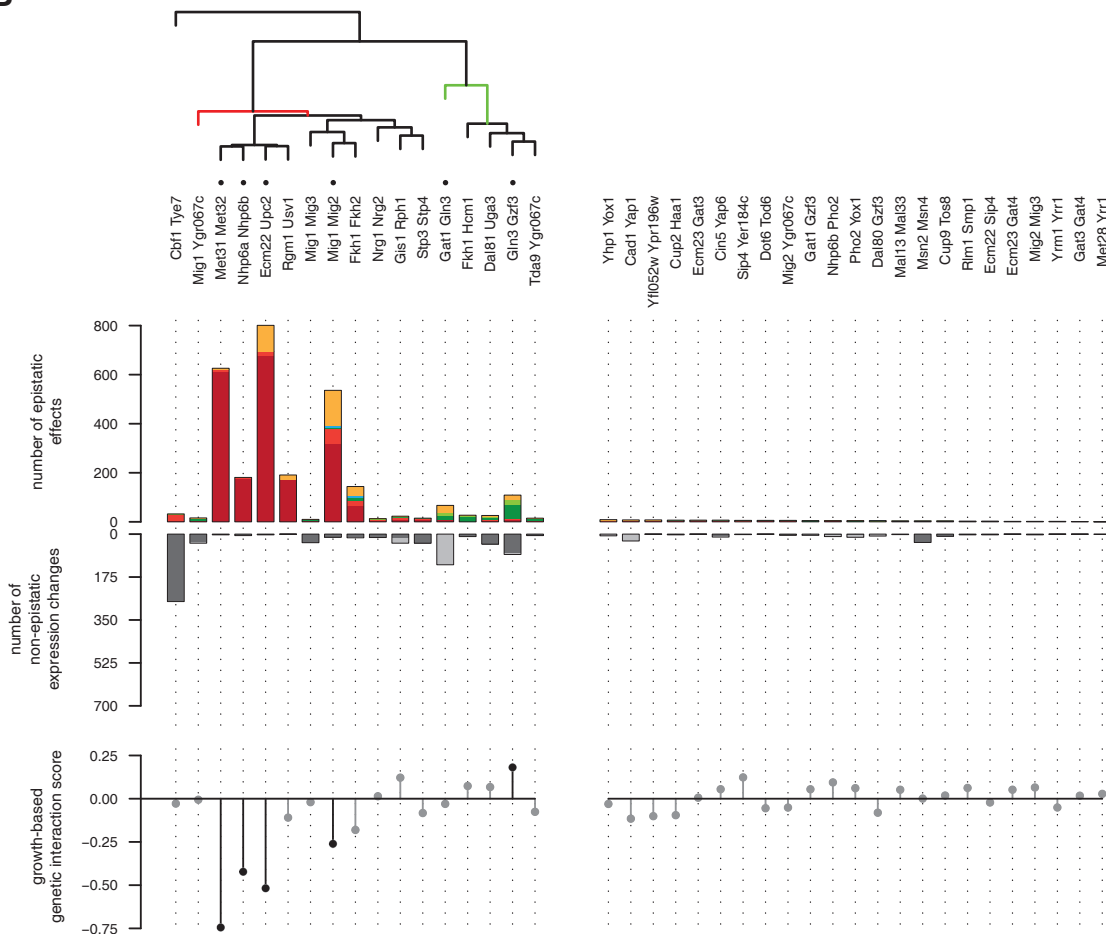

Supplement: 12915_2015_222_MOESM3_ESM.pdf [file 12915_2015_222_MOESM3_ESM.pdf]
